# Supplementary material
Source: Research Square preprint supplement (doi:10.21203/rs.3.rs-8072450/v1)
Supplement: Supplementary file 1 [file 6508de6cd7223100af642b1e.xlsx]

## Sheet: Boundary_Conditions_Matrix
Mechanism	Boundary factor (context)	Effect (+/−)	Mechanism aspect impacted	Rationale (aligned to manuscript)	Strengthening / mitigation strategies
M1: Authentic tasks → Moral imagination	Assessment regime (exam-oriented vs. authentic-assessment)	− / +	Authenticity salience; scenario generation depth	Exam-oriented scoring shifts attention to 'product marks' over multi-stakeholder exploration; authentic-assessment rubrics reward perspective diversity and future-impact reasoning.	Adopt assessment rubrics with indicators for stakeholder-perspective breadth and counterfactual articulation; include low-stakes exploration stages.
M2: Structured peer critique → Moral judgment	Assessment regime (exam-oriented vs. authentic-assessment)	− / +	Public reasoning turns; quality of justification; revision magnitude	Single-shot, score-heavy grading reduces willingness to expose drafts and engage in role-based debate; process-oriented grading encourages iterative justification and principled revisions.	Weight iterative critique cycles and reason-giving criteria; separate process grades from final product marks.
M3: Heterogeneous teams → Empathy	Assessment regime (exam-oriented vs. authentic-assessment)	− / +	Perspective integration; conflict mediation evidence; empathic statements	If only final outputs are graded, teams minimize time spent on perspective-taking and conflict work; authentic-assessment values integration of diverse viewpoints.	Include criteria for viewpoint integration and conflict mediation; require brief reflective memos.
M1: Authentic tasks → Moral imagination	Teacher preparation for ethics facilitation	+	Stakeholder mapping completeness; perspective diversity	Prepared instructors elicit absent/weak stakeholders and scaffold counterfactual thinking tied to real impacts.	Provide mini-cases and prompts for 'missing stakeholders' and long-term impact mapping.
M2: Structured peer critique → Moral judgment	Teacher preparation for ethics facilitation	+	Justification quality; counterargument handling	Instructors trained in facilitating public reasoning maintain norms for principle-based argumentation and counterargument uptake.	Run short facilitation training; use talk-moves and role cards to sustain reason-giving norms.
M3: Heterogeneous teams → Empathy	Teacher preparation for ethics facilitation	+	Role rotation fidelity; empathic perspective-taking	Teachers cue rotation and reflective listening, turning heterogeneity into empathic growth instead of friction.	Schedule planned rotations and debriefs; coach reflective listening techniques.
M1: Authentic tasks → Moral imagination	Project ethics governance (review/oversight)	+	Ethical impact statements; stakeholder engagement records	Lightweight ethics review requires teams to articulate foreseeable impacts and mitigation plans, deepening imagination of consequences.	Add pre-project ethics checklists and mid-course review; archive impact statements.
M2: Structured peer critique → Moral judgment	Project ethics governance (review/oversight)	+	Reason transparency; revision traceability	Governance mechanisms (templates, sign-offs) enforce documentation of reasons and revisions, making judgment processes explicit and auditable.	Adopt critique templates with change logs; require tutor sign-offs on major revisions.
M3: Heterogeneous teams → Empathy	Project ethics governance (review/oversight)	+	Protection of vulnerable voices; inclusion evidence	Oversight protects vulnerable stakeholders and ensures inclusion protocols, channeling team diversity into ethical consideration.	Include inclusion/consent protocols; log stakeholder contact and consent scope (if applicable).
M1: Authentic tasks → Moral imagination	Community partnerships (real clients/beneficiaries)	+	Context specificity; scenario realism	Partnerships surface lived realities and trade-offs, enabling richer counterfactuals and stakeholder repertoires.	Co-design briefs with partners; collect constraints and success criteria from beneficiaries.
M2: Structured peer critique → Moral judgment	Community partnerships (real clients/beneficiaries)	+	Principle–stakeholder alignment; defensibility to public audience	Facing real partners raises the standard for reasons and fairness norms in public defense.	Invite partners to critique days; align rubrics with public defensibility.
M3: Heterogeneous teams → Empathy	Community partnerships (real clients/beneficiaries)	+	Empathic statements grounded in partner input; transfer to action	Direct contact with beneficiaries grounds empathic understanding and motivates prosocial agency.	Add partner interviews/shadowing; require empathic design notes tied to partner quotes.
