# Supplementary material
Source: Research Square preprint supplement (doi:10.21203/rs.3.rs-8072450/v1)
Supplement: Supplementary file 1 [file 7995cf9dcb6b7d33787a65ee.docx]

# Rubric: Structured Peer Critique & Public Reasoning

Purpose: operationalize P2 (Structured peer critique → Role-taking & justification → Moral judgment). Rate 1–4; multiply by weight for total score.

Rating scale: 4=Exemplary, 3=Proficient, 2=Developing, 1=Beginning.

| Criterion | Operational indicators | 4: Exemplary | 3: Proficient | 2: Developing | 1: Beginning | Weight |
| --- | --- | --- | --- | --- | --- | --- |
| Public reasoning quality | Clarity of claims; use of principles/evidence; counterargument handling; coherence across critique cycles. | Claims consistently justified with principles/evidence; addresses counterarguments comprehensively; coherent across cycles. | Relevant reasons with partial principles/evidence; addresses some counterarguments; mostly coherent. | Superficial or inconsistent reasons; limited engagement with counterarguments; coherence weak. | Assertions with minimal reasons; ignores counterarguments; incoherent. | 30% |
| Role-taking & perspective integration | Identifies stakeholder viewpoints; perspective-taking; integration of conflicting views in revisions. | Demonstrates perspective-taking across stakeholders; integrates conflicting viewpoints into revised positions. | Identifies multiple perspectives; attempts integration in revisions. | Acknowledges other views but limited integration; revisions are minor. | Single-perspective focus; no evidence of integration. | 25% |
| Revision magnitude & responsiveness | Substantive changes between drafts; traceable responses to critique; rationale clarity. | Substantive revisions in response to critique; clear rationale documented. | Meaningful revisions; partial rationale documented. | Minor edits; rationale unclear or missing. | No meaningful revisions. | 20% |
| Ethical impact articulation | Identification of trade-offs; articulation of short-/long-term impacts for stakeholders; mitigation strategies. | Explicit trade-offs and longer-term impacts articulated; proposes plausible mitigation strategies. | Trade-offs identified; some future-impact discussion; partial mitigation ideas. | Brief trade-off mention; impacts vague; mitigation absent. | No trade-offs or impact discussion. | 15% |
| Civic/professional conduct in critique | Constructive tone; evidence-based challenges; time management; respectful turn-taking. | Consistently constructive, evidence-based, and respectful; models professional discourse. | Generally constructive and respectful; occasional lapses. | Mixed tone; reminders needed to stay constructive/respectful. | Dismissive or off-task; frequent facilitation needed. | 10% |
